# Supplementary material
Source: PubMed Central journal article supplement (PMC7613308)
Supplement: EMS146014-supplement-Supplementary_information.pdf [file EMS146014-supplement-Supplementary_information.pdf]

## **Supplementary information**

### **Climate legacies drive the distribution and future restoration potential of dryland forests**

Emilio Guirado\*, Manuel Delgado-Baquerizo, Jaime Martínez-Valderrama, Siham Tabik, Domingo Alcaraz-Segura, Fernando T. Maestre

\*Corresponding author: [emilio.guirado@ua.es](mailto:emilio.guirado@ua.es)

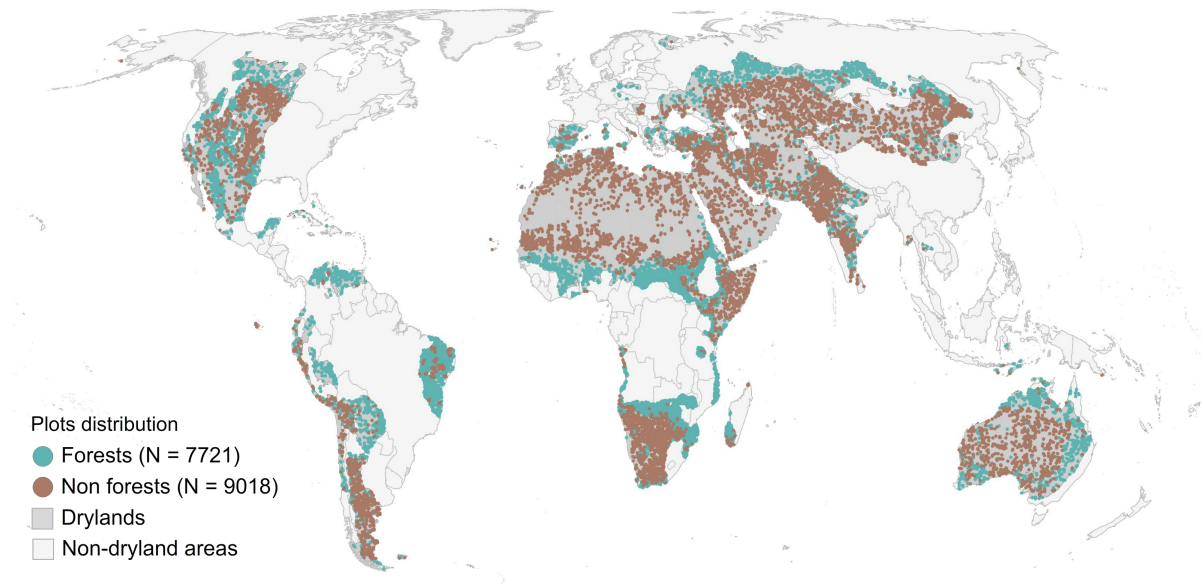

**Supplementary Fig. 1: Distribution of the Convolutional Neural Network-classified forest and non-forest plots used in the variation partitioning and random forest analyses.**

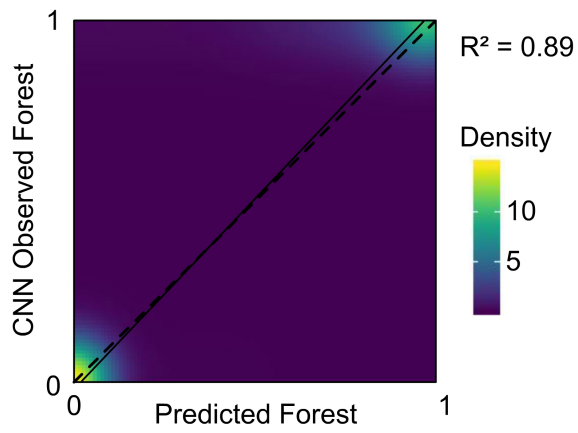

**Supplementary Fig. 2: Density plot of observed (using Convolutional Neural Network, CNN) and predicted (using random forest) forest areas. The 1:1 and regression lines are shown in dashed and solid black, respectively (slope = 1.04;  $R^2 = 0.89$ ), showing that the random forest model is not biased.**

|                | Forest class                                                                        |                                                                                     |                                                                                      |                                                                                       |
|----------------|-------------------------------------------------------------------------------------|-------------------------------------------------------------------------------------|--------------------------------------------------------------------------------------|---------------------------------------------------------------------------------------|
|                | Hyper-arid                                                                          | Arid                                                                                | Semi-arid                                                                            | Dry sub-humid                                                                         |
| True Positive  |    |    |    |    |
| False Positive |    |    |    |    |
| True Negative  |   |   |   |   |
| False Negative |  |  |  |  |

**Supplementary Fig. 3: Examples of plots classified with the Convolutional Neural Networks across different aridity levels.** A true positive is an outcome in which the model correctly predicts the forest class. Similarly, a true negative is an outcome where the model correctly predicts the non-forest class. A false positive is an outcome where the model incorrectly predicts the non-forest class (it predicts a forest when it should be a non-forested area). A false negative is an outcome where the model incorrectly predicts

the forest class (it predicts a non-forest when it should be a forest). Map data: Google, Maxar Technologies.

**Supplementary Table 1.** Climatic, soil and other environmental variables used in this study, with their abbreviations and sources (references are found in the main text).

| <b>Variable</b>                                                                                 | <b>Data Source</b>         | <b>Abbreviation</b> |
|-------------------------------------------------------------------------------------------------|----------------------------|---------------------|
| Annual Mean Temperature                                                                         | Worldclim <sup>23</sup>    | AMT                 |
| Mean Diurnal Range (Mean of monthly (max temp - min temp))                                      | Worldclim <sup>23</sup>    | MDRM                |
| Isothermality (MDRM/TARBIO) ( $\times 100$ )                                                    | Worldclim <sup>23</sup>    | IBIO                |
| Temperature Seasonality (SD $\times 100$ )                                                      | Worldclim <sup>23</sup>    | TS                  |
| Max Temperature of Warmest Month                                                                | Worldclim <sup>23</sup>    | MTWM                |
| Min Temperature of Coldest Month                                                                | Worldclim <sup>23</sup>    | MTCM                |
| Temperature Annual Range (MTWM-MTCM)                                                            | Worldclim <sup>23</sup>    | TARBIO              |
| Mean Temperature of Wettest Quarter                                                             | Worldclim <sup>23</sup>    | MTWeQ               |
| Mean Temperature of Driest Quarter                                                              | Worldclim <sup>23</sup>    | MTDQ                |
| Mean Temperature of Warmest Quarter                                                             | Worldclim <sup>23</sup>    | MTWaQ               |
| Mean Temperature of Coldest Quarter                                                             | Worldclim <sup>23</sup>    | MTCQ                |
| Annual Precipitation                                                                            | Worldclim <sup>23</sup>    | AP                  |
| Precipitation of Wettest Month                                                                  | Worldclim <sup>23</sup>    | PWM                 |
| Precipitation of Driest Month                                                                   | Worldclim <sup>23</sup>    | PDM                 |
| Precipitation Seasonality (CV)                                                                  | Worldclim <sup>23</sup>    | PSCV                |
| Precipitation of Wettest Quarter                                                                | Worldclim <sup>23</sup>    | PWeQ                |
| Precipitation of Driest Quarter                                                                 | Worldclim <sup>23</sup>    | PDQ                 |
| Precipitation of Warmest Quarter                                                                | Worldclim <sup>23</sup>    | PWaQ                |
| Precipitation of Coldest Quarter                                                                | Worldclim <sup>23</sup>    | PCQ                 |
| Albedo                                                                                          | MODIS/Terra <sup>46</sup>  | Albedo              |
| Evapotranspiration                                                                              | MODIS/Terra <sup>48</sup>  | ET                  |
| Soil Slope                                                                                      | ALOS <sup>47</sup>         | Slope               |
| Soil Moisture                                                                                   | TerraClimate <sup>44</sup> | Soil moisture       |
| Elevation in metres above sea level                                                             | ALOS <sup>47</sup>         | Elevation           |
| PH in water soil                                                                                | Soilgrids <sup>25</sup>    | PH                  |
| Soil Organic Carbon                                                                             | Soilgrids <sup>25</sup>    | SOC                 |
| Soil Texture                                                                                    | Soilgrids <sup>25</sup>    | Sands               |
| Soil Nitrogen                                                                                   | Soilgrids <sup>25</sup>    | Nit                 |
| Piezometric level balance of the aquifer (cumulative groundwater level height over time period) | GRACE <sup>49</sup>        | Water Thickness     |

**Supplementary Table 2. Indicators used to assess the accuracy of the forest/non-forest classification.** True positives (TP) correspond to images that were correctly classified by the models, false positives (FP) correspond to images that were classified by the models in one class but were from another class, and false negatives (FN) correspond to images of the targeted class that were classified by the models into another class. The Precision metric measures the quality of the machine learning model in classification tasks. The Recall metric indicates how much the machine learning model can identify. The F1-measure value is an equal balance between Precision and Recall, measuring the quality and exhaustiveness of the model in classifying forest/non-forest areas (Precision, Recall, and F1-measure close to 1 is better).

| Regions             |     |    |     |    | Forest    |        |      | Non-Forest |        |      | Total   |
|---------------------|-----|----|-----|----|-----------|--------|------|------------|--------|------|---------|
|                     | TP  | FP | TN  | FN | Precision | Recall | F1   | Precision  | Recall | F1   | F1 mean |
| Global              | 234 | 32 | 344 | 28 | 0.88      | 0.89   | 0.89 | 0.92       | 0.91   | 0.92 | 0.90    |
| 1-NothAmerica       | 26  | 5  | 25  | 0  | 0.84      | 1.00   | 0.91 | 1.00       | 0.83   | 0.91 | 0.91    |
| 2-EastSouthAmerica  | 16  | 2  | 25  | 4  | 0.89      | 0.80   | 0.84 | 0.86       | 0.93   | 0.89 | 0.87    |
| 3-Europe            | 15  | 2  | 26  | 1  | 0.88      | 0.94   | 0.91 | 0.96       | 0.93   | 0.95 | 0.93    |
| 4-NorthernAfrica    | 14  | 0  | 37  | 5  | 1.00      | 0.74   | 0.85 | 0.88       | 1.00   | 0.94 | 0.89    |
| 5-Sahel             | 19  | 2  | 22  | 4  | 0.90      | 0.83   | 0.86 | 0.85       | 0.92   | 0.88 | 0.87    |
| 6-HornAfrica        | 27  | 6  | 22  | 2  | 0.82      | 0.93   | 0.87 | 0.92       | 0.79   | 0.85 | 0.86    |
| 7-MiddleEast        | 12  | 1  | 35  | 1  | 0.92      | 0.92   | 0.92 | 0.97       | 0.97   | 0.97 | 0.95    |
| 8-CentralAsia       | 20  | 0  | 37  | 1  | 1.00      | 0.95   | 0.98 | 0.97       | 1.00   | 0.99 | 0.98    |
| 9-Australia         | 22  | 2  | 21  | 1  | 0.92      | 0.96   | 0.94 | 0.95       | 0.91   | 0.93 | 0.93    |
| 10-SouthernAfrica   | 27  | 6  | 22  | 1  | 0.82      | 0.96   | 0.89 | 0.96       | 0.79   | 0.86 | 0.87    |
| 11-WestSouthAmerica | 18  | 2  | 34  | 4  | 0.90      | 0.82   | 0.86 | 0.89       | 0.94   | 0.92 | 0.89    |
| 12-SouthwestAsia    | 18  | 4  | 38  | 4  | 0.82      | 0.82   | 0.82 | 0.90       | 0.90   | 0.90 | 0.86    |
| <b>Drylands</b>     |     |    |     |    |           |        |      |            |        |      |         |
| Hyper-arid          | 3   | 2  | 41  | 1  | NA        | NA     | NA   | 0.98       | 0.95   | 0.96 | 0.96    |
| Arid                | 63  | 6  | 83  | 8  | 0.91      | 0.89   | 0.90 | 0.91       | 0.93   | 0.92 | 0.91    |
| Semi-arid           | 79  | 11 | 108 | 10 | 0.88      | 0.89   | 0.88 | 0.92       | 0.91   | 0.91 | 0.90    |
| Dry sub-humid       | 89  | 13 | 111 | 9  | 0.87      | 0.91   | 0.89 | 0.93       | 0.90   | 0.91 | 0.90    |

**Tree Cover**

|         |    |    |     |    |      |      |      |      |      |      |      |
|---------|----|----|-----|----|------|------|------|------|------|------|------|
| <0.10   | 1  | 5  | 120 | 1  | NA   | NA   | NA   | 0.99 | 0.96 | 0.98 | 0.98 |
| 10-40%  | 74 | 12 | 98  | 10 | 0.86 | 0.88 | 0.87 | 0.91 | 0.89 | 0.90 | 0.88 |
| 41-65%  | 79 | 6  | 66  | 11 | 0.93 | 0.88 | 0.90 | 0.86 | 0.92 | 0.89 | 0.89 |
| 66-100% | 80 | 9  | 60  | 6  | 0.90 | 0.93 | 0.91 | 0.91 | 0.87 | 0.89 | 0.90 |

---



**Supplementary Table 3. Summary of the indicators used to assess classification**

**accuracy.** True positives correspond to images that were correctly classified by the model, false positives correspond to images that were misclassified by the model, and false negatives correspond to images of the targeted class that were classified by the models into another class. See examples of true/false positives and negatives in Supplementary Fig. 3.

| <b>Accuracy indicator</b>                | <b>Equation</b>                                                                 | <b>Interpretation</b>                                          |
|------------------------------------------|---------------------------------------------------------------------------------|----------------------------------------------------------------|
| Precision (or positive predictive value) | $\frac{\text{true positives}}{\text{true positives} + \text{false positives}}$  | How many detected forests (or non-forests) are true.           |
| Recall (or sensitivity)                  | $\frac{\text{true positives}}{\text{true positives} + \text{false negatives}}$  | How many actual Forests (or Non-forests) are detected.         |
| F1-measure (or F1-score)                 | $\frac{2 * \text{Precision} * \text{Recall}}{\text{Precision} + \text{Recall}}$ | Index that evaluates the balance between Precision and Recall. |

**Supplementary Table 4. Importance of variables predicting the current forest distribution in global drylands from random forest permutation analysis.** Current Climate (CC), mid-Holocene (MH). %IncMSE indicates the increase of the Mean Squared Error when a given variable is randomly permuted and p-value (for one-sided testing).

| <b>Variable</b>     | <b>%IncMSE</b> | <b>p-value</b> |
|---------------------|----------------|----------------|
| Albedo              | 41.42877       | 0.01           |
| PH                  | 36.91288       | 0.01           |
| Latitude            | 25.61112       | 0.01           |
| Water Thickness     | 21.82914       | 0.01           |
| Elevation           | 21.71287       | 0.01           |
| PWaQ (CC)           | 19.8868        | 0.01           |
| Slope               | 19.31883       | 0.01           |
| Soil Moisture       | 18.85622       | 0.01           |
| PDQ (MH)            | 18.48542       | 0.01           |
| PCQ (MH)            | 18.33577       | 0.01           |
| Longitude           | 17.9886        | 0.01           |
| MDRM (CC)           | 17.78976       | 0.01           |
| MDRM (MH)           | 17.782         | 0.01           |
| PWaQ (MH)           | 16.29423       | 0.01           |
| Sand                | 15.81528       | 0.01           |
| MTDQ (CC)           | 15.73885       | 0.01           |
| PCQ (CC)            | 15.66399       | 0.01           |
| PDQ (CC)            | 15.14815       | 0.01           |
| Evapotranspiration  | 14.875         | 0.01           |
| Soil Organic Carbon | 14.76194       | 0.01           |
| MTWeQ (MH)          | 14.30748       | 0.01           |
| MTCM (MH)           | 14.1081        | 0.01           |
| MTWM (CC)           | 13.7493        | 0.01           |
| PSCV (CC)           | 13.29451       | 0.01           |
| PDM (MH)            | 13.25064       | 0.01           |

|                  |          |      |
|------------------|----------|------|
| TARBIO (CC)      | 13.19653 | 0.01 |
| MTWaQ (CC)       | 13.1097  | 0.01 |
| MTCQ (MH)        | 12.98462 | 0.01 |
| MTCM (CC)        | 12.9202  | 0.01 |
| AP (CC)          | 12.8788  | 0.01 |
| MTWeQ (CC)       | 12.48877 | 0.01 |
| MTDQ (MH)        | 12.15014 | 0.01 |
| MTWM (MH)        | 12.09465 | 0.01 |
| IBIO (MH)        | 12.09444 | 0.01 |
| IBIO (CC)        | 11.85019 | 0.01 |
| Nitrogen in soil | 11.72474 | 0.01 |
| AP (MH)          | 11.56379 | 0.01 |
| TS (MH)          | 10.99323 | 0.01 |
| PSCV (MH)        | 10.89148 | 0.01 |
| MTWaQ (MH)       | 10.79875 | 0.01 |
| MTCQ (CC)        | 10.73665 | 0.01 |
| PDM (CC)         | 10.71321 | 0.01 |
| AMT (CC)         | 10.65666 | 0.01 |
| QWeQ (MH)        | 10.63615 | 0.01 |
| PWM (MH)         | 10.53345 | 0.01 |
| TARBIO (MH)      | 10.52528 | 0.01 |
| PWeQ (CC)        | 10.23841 | 0.01 |
| TS (CC)          | 9.3317   | 0.01 |
| PWM (CC)         | 8.66222  | 0.01 |
| AMT (MH)         | 7.801763 | 0.01 |

---

**Supplementary Data 1. Dataset for train Convolutional Neural Networks.**

Supplementary Data 1 is available online as a comma separated values file under the Figshare repository. <https://doi.org/10.6084/m9.figshare.13635212>

**Supplementary Data 2. Dataset of 16,739 plots (0.5 ha) location and classification.**

Supplementary Data 2 is available online as a comma separated values file under the Figshare repository. <https://doi.org/10.6084/m9.figshare.13635212>
